# Supplementary material for: Thermoplastic Disks Used for Commercial Orthodontic Aligners: Complete Physicochemical and Mechanical Characterization
Source: PubMed Central journal article supplement (PMC7287673; doi:10.3390/ma13102386), 2020-05-22
Supplement: materials-13-02386-s001.pdf [file materials-13-02386-s001.pdf]

# Supplementary Materials: Thermoplastic Disks Used for Commercial Orthodontic Aligners: Complete Physicochemical and Mechanical Characterization

Valeria Daniele <sup>1</sup>, Ludovico Macera <sup>1,\*</sup>, Giuliana Taglieri <sup>1</sup>, Alessandra Di Giambattista <sup>1</sup>, Giuseppe Spagnoli <sup>1</sup>, Alessandra Massaria <sup>2</sup>, Massimo Messori <sup>3</sup>, Enrico Quagliariini <sup>4</sup>, Gianluca Chiappini <sup>5</sup>, Vincenzo Campanella <sup>6</sup>, Stefano Mummolo <sup>2</sup>, Enrico Marchetti <sup>2</sup>, Giuseppe Marzo <sup>2</sup> and Vincenzo Quinzi <sup>2</sup>

<sup>1</sup> Department of Industrial and Information Engineering and Economics, University of L'Aquila, Piazzale Pontieri 1, Monteluco di Roio, 67100 L'Aquila, Italy; valeria.daniele@univaq.it (V.D.); giuliana.taglieri@univaq.it (G.T.); digiambaale@hotmail.it (A.D.G.); giuseppe.spagnoli@univaq.it (G.S.);

<sup>2</sup> Department of Life, Health & Environmental Sciences, Postgraduate School of Orthodontics, University of L'Aquila, P.le Salvatore Tommasi 1, Ed. Delta 6, 67100 Coppito L'Aquila, Italy; massariaalessandra@gmail.com (A.M.); stefano.mummolo@cc.univaq.it (S.M.); enrico.marchetti@cc.univaq.it (E.M.); giuseppe.marzo@univaq.it (G.M.); vincenzo.quinzi@univaq.it (V.Q.)

<sup>3</sup> Department of Engineering 'Enzo Ferrari', University of Modena and Reggio Emilia, Via P. Vivarelli 10, 41125 Modena, Italy; mmessori@unimore.it

<sup>4</sup> Department of Construction, Civil Engineering and Architecture, Polytechnic University of Marche, 60121 Ancona, Italy; e.quagliariini@staff.univpm.it

<sup>5</sup> Department of Industrial Engineering and Mathematical Sciences, Polytechnic University of Marche, via Brece Bianche snc, 60131 Ancona, Italy; g.chiappini@univpm.it

<sup>6</sup> Department of Clinical Science and Translational Medicine, University of Rome "Tor Vergata", Via Montpellier 1, 00133 Roma, Italy; vincenzo.campanella@uniroma2.it

\* Correspondence: ludovico.macera@graduate.univaq.it

## Supplementary Materials

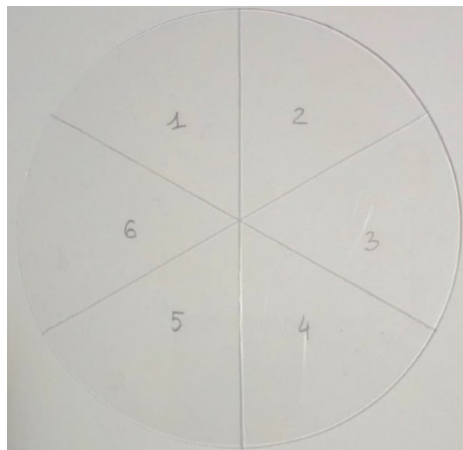

**Figure S1.** The as-received thermoplastic materials properly cut into six equal segments.

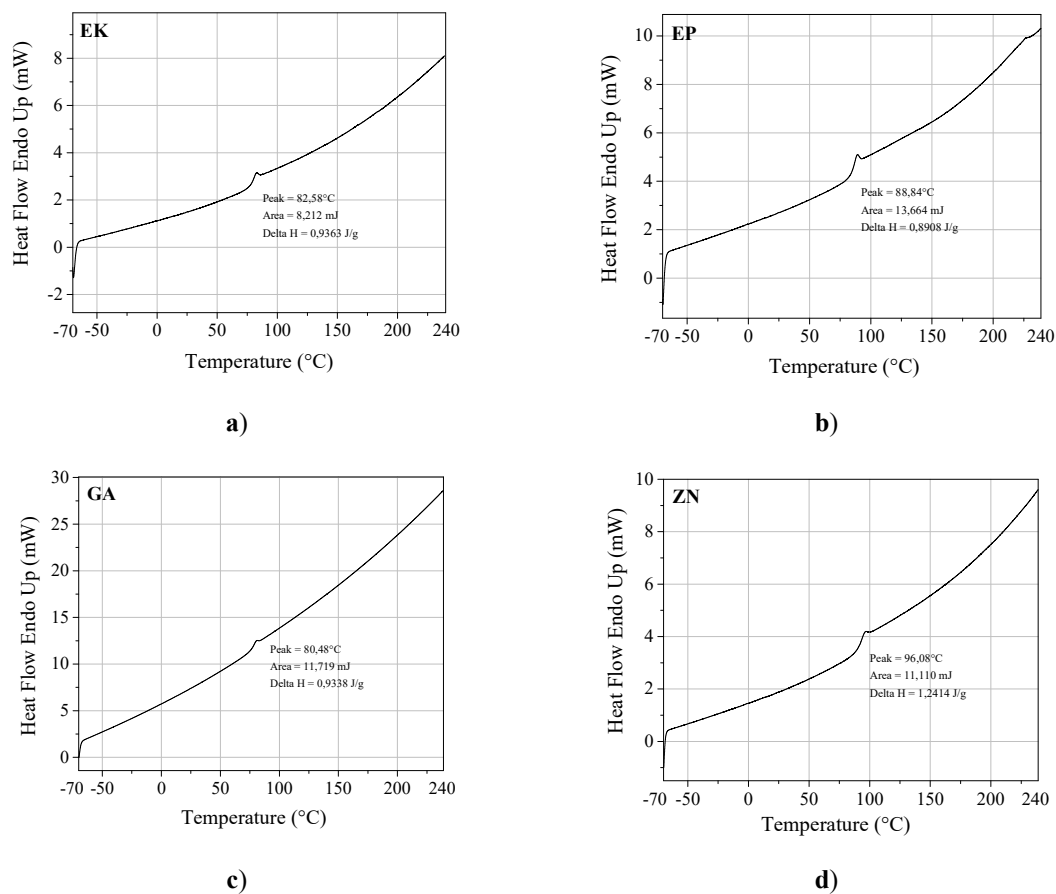

**Figure S2.** DSC results for: a) EK, b) EP, c) GA, d) ZN thermoplastic materials, respectively.

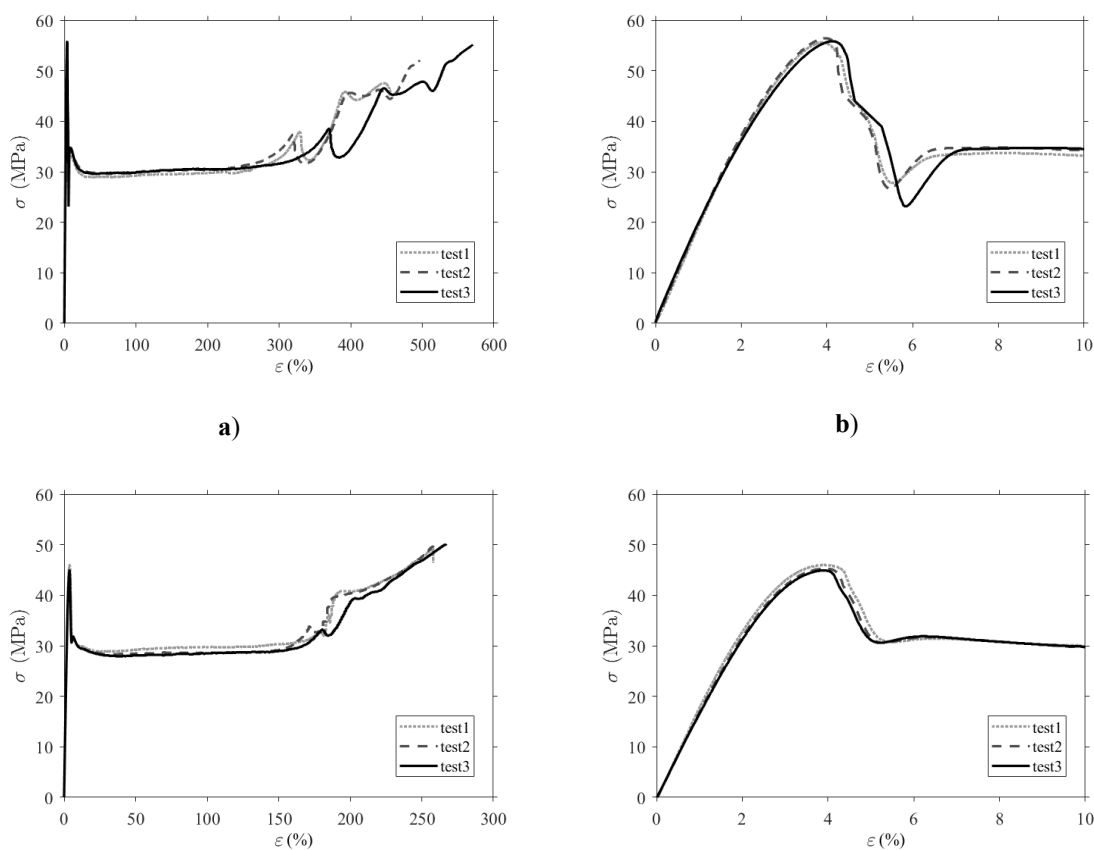

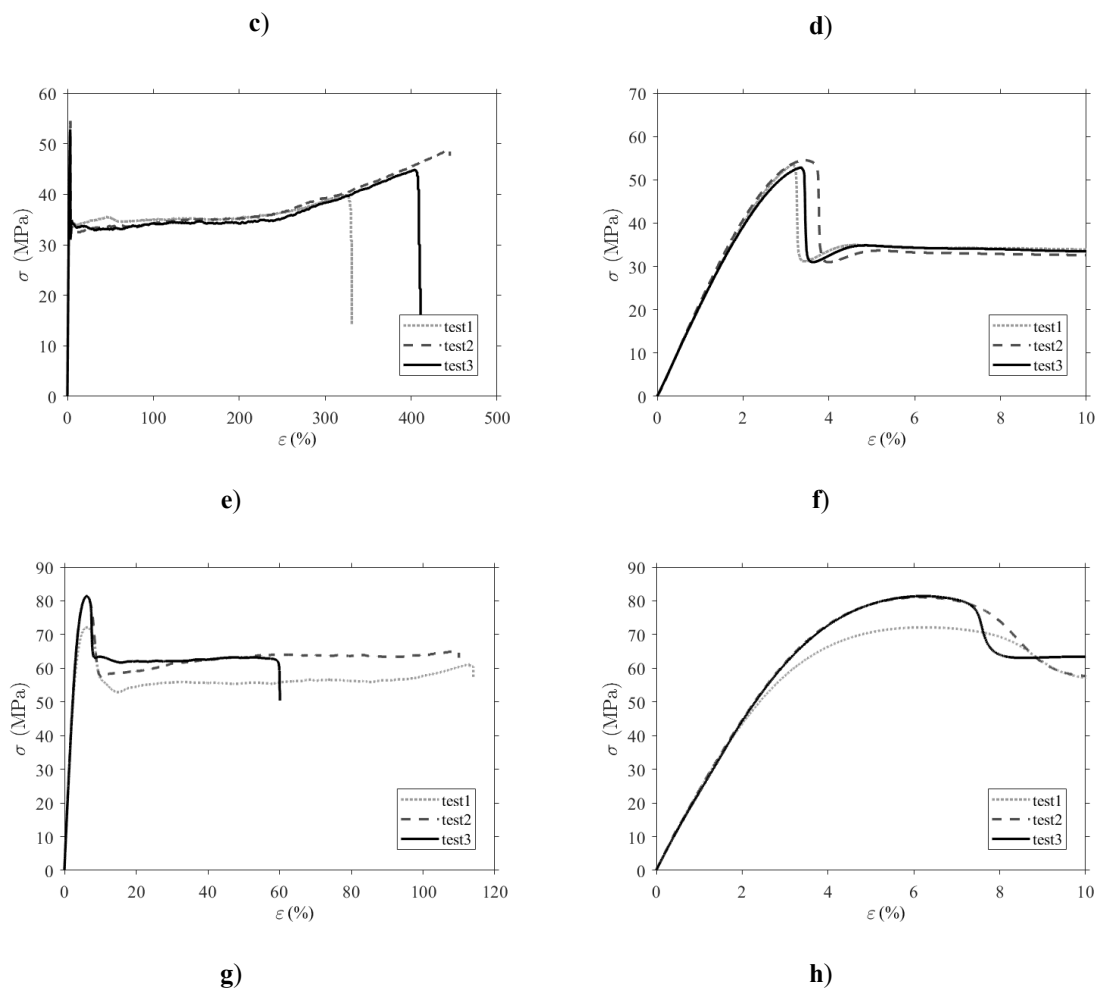

**Figure S3.** Experimental stress-strain curves: a-b) EK; c-d) EP; e-f) GA; g-h) ZN.

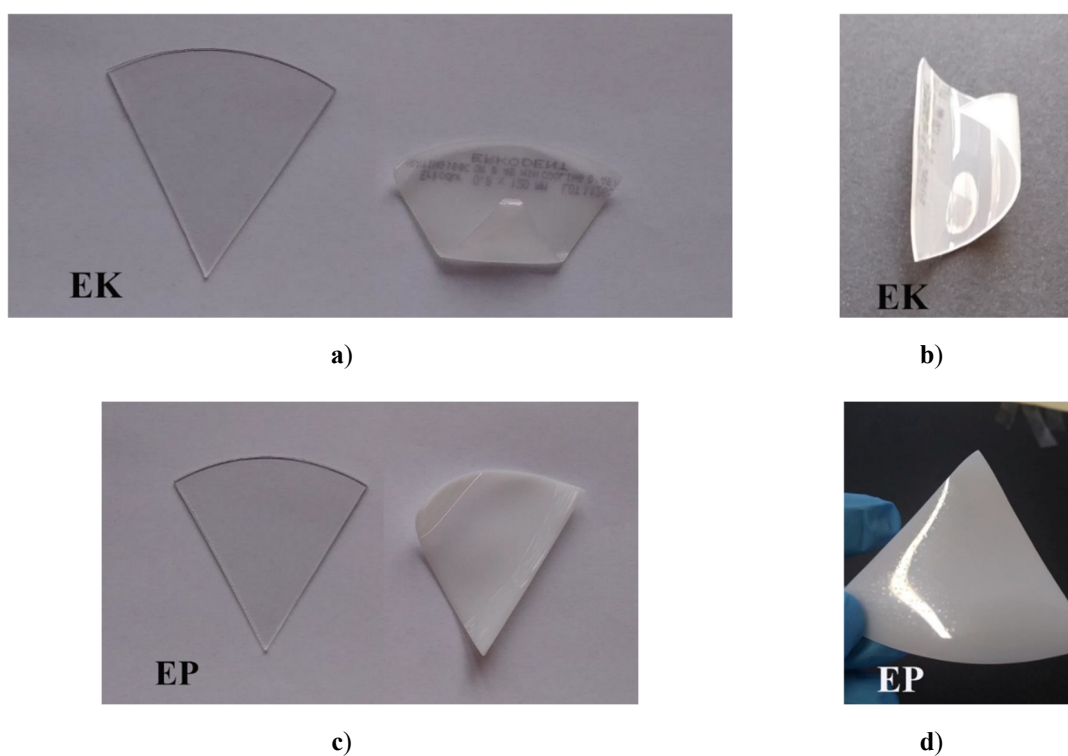

**Figure S4.** Visual observations of EK and EP samples after immersion in water at 70 °C: **a-c)** comparison between the as-received sample (left) and the disk immersed for 1 h (right); **b-d)** samples after 6 days of immersion.

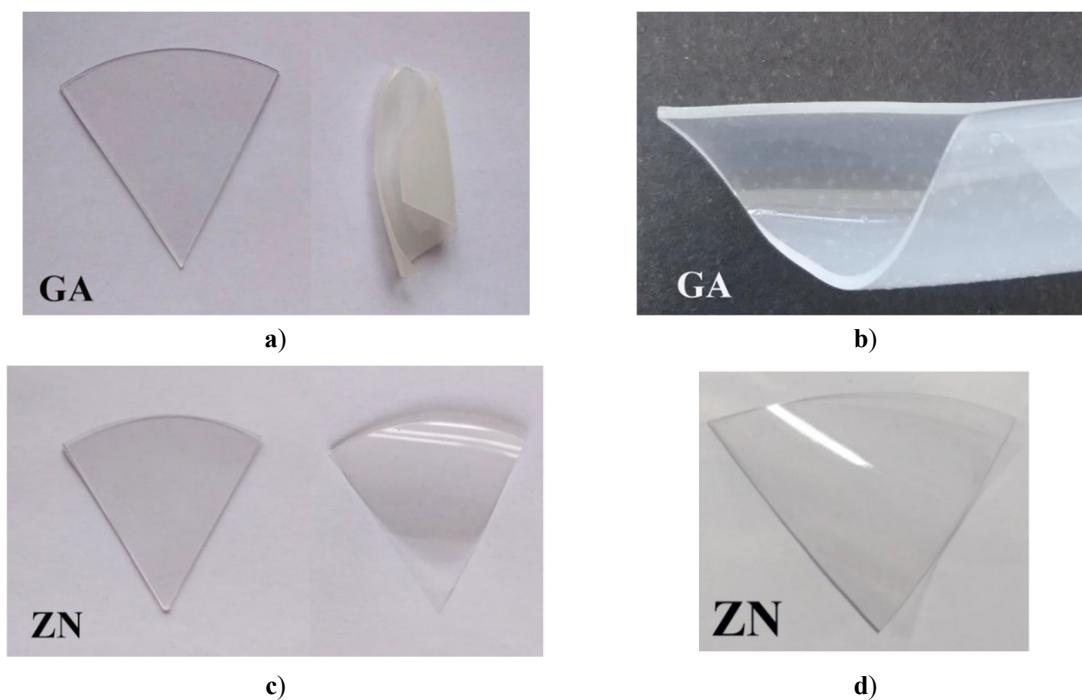

**Figure S5.** Visual observations of GA and ZN samples after immersion in water at 70 °C: **a-c)** comparison between the as-received sample (left) and the disk immersed for 15 min (right), respectively; **b-d)** samples after 6 days of immersion.

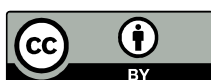

© 2020 by the authors. Submitted for possible open access publication under the terms and conditions of the Creative Commons Attribution (CC BY) license (<http://creativecommons.org/licenses/by/4.0/>).
